# Supplementary material for: Reclassified the phenotypes of cancer types and construct a nomogram for predicting bone metastasis risk: A pan‐cancer analysis
Source: PubMed Central journal article supplement (PMC10905679; doi:10.1002/cam4.7014), 2024-03-01
Supplement: CAM4-13-e7014-s001.pdf [file CAM4-13-e7014-s001.pdf]

**Appendix file 7: Univariable and Multivariable Logistic regression analysis for the risk factors for bone metastasis occurrence.**

| Factors                     | Non-Bone Metastasis<br>N (%) | Bone Metastasis<br>N (%) | Univariable Logistic regression |                | Multivariable Logistic regression |                |
|-----------------------------|------------------------------|--------------------------|---------------------------------|----------------|-----------------------------------|----------------|
|                             |                              |                          | OR (95%CI)                      | <i>P-value</i> | OR (95%CI)                        | <i>P-value</i> |
| <b>Age (years)</b>          |                              |                          |                                 | <0.001         |                                   |                |
| <65                         | 1193642(51.6)                | 54993(44.2)              | 1.00                            |                | 1.00                              |                |
| ≥65                         | 1120722(48.4)                | 69323(55.8)              | 1.34(1.33-1.36)                 |                | 1.16(1.14-1.19)                   | <0.001         |
| <b>Gender</b>               |                              |                          |                                 | <0.001         |                                   |                |
| Male                        | 1131729(48.9)                | 72107(58.0)              | 1.00                            |                | 1.00                              |                |
| Female                      | 1182635(51.1)                | 52209(42.0)              | 0.69(0.68-0.70)                 |                | 0.70(0.68-0.71)                   | <0.001         |
| <b>Race</b>                 |                              |                          |                                 |                |                                   |                |
| White                       | 1864576(81.7)                | 98313(79.3)              | 1.00                            |                | 1.00                              |                |
| Black                       | 248296(10.9)                 | 15993(12.9)              | 1.22(1.20-1.24)                 | <0.001         | 1.06(1.03-1.10)                   | <0.001         |
| Asian or pacific islander   | 155932(6.8)                  | 8876(7.2)                | 1.08(1.06-1.10)                 | <0.001         | 0.92(0.88-0.96)                   | <0.001         |
| American Indian             | 13841(0.6)                   | 770(0.6)                 | 1.06(0.98-1.14)                 | <0.001         | 0.87(0.75-1.00)                   | <0.001         |
| <b>Married status</b>       |                              |                          |                                 | <0.001         |                                   |                |
| Others                      | 872520(41.3)                 | 55247(46.7)              | 1.00                            |                | 1.00                              |                |
| Married                     | 1241789(58.7)                | 63052(53.3)              | 0.80(0.79-0.81)                 |                | 0.88(0.86-0.90)                   | <0.001         |
| <b>Insurance</b>            |                              |                          |                                 |                |                                   |                |
| Uninsured                   | 52449(2.3)                   | 4438(3.7)                | 1.00                            |                | 1.00                              |                |
| Medical aid                 | 258106(11.8)                 | 19130(15.8)              | 0.88(0.85-0.91)                 | <0.001         | 0.88(0.82-0.94)                   | <0.001         |
| Insured                     | 1885347(85.9)                | 97889(80.5)              | 0.61(0.60-0.63)                 | <0.001         | 0.74(0.70-0.79)                   | <0.001         |
| <b>Differentiated Grade</b> |                              |                          |                                 |                |                                   |                |
| Well differentiated         | 293786(18.5)                 | 2824(5.1)                | 1.00                            |                | 1.00                              |                |
| Moderate differentiated     | 688273(43.2)                 | 14259(25.9)              | 2.16(2.07-2.25)                 | <0.001         | 1.46(1.39-1.53)                   | <0.001         |
| Poor differentiated         | 502602(31.6)                 | 33474(60.9)              | 6.93(6.67-7.20)                 | <0.001         | 2.81(2.67-2.94)                   | <0.001         |

|                             |               |              |                    |        |                 |        |
|-----------------------------|---------------|--------------|--------------------|--------|-----------------|--------|
| Undifferentiated            | 107183(6.7)   | 4438(8.1)    | 4.31(4.11-4.52)    | <0.001 | 2.76(2.60-2.94) | <0.001 |
| <b>T stage</b>              |               |              |                    |        |                 |        |
| T1                          | 1015780(48.3) | 17655(18.5)  | 1.00               |        | 1.00            |        |
| T2                          | 536989(25.5)  | 26792(28.1)  | 2.87(2.82-2.93)    | <0.001 | 1.49(1.44-1.53) | <0.001 |
| T3                          | 378546(18.0)  | 22116(23.2)  | 3.36(3.29-3.43)    | <0.001 | 1.39(1.34-1.44) | <0.001 |
| T4                          | 171707(8.2)   | 28888(30.3)  | 9.68(9.49-9.87)    | <0.001 | 2.39(2.30-2.48) | <0.001 |
| <b>Lymphatic metastasis</b> |               |              |                    |        |                 |        |
| N0                          | 1628718(75.3) | 37009(34.8)  | 1.00               |        | 1.00            |        |
| N1                          | 303170(14.0)  | 24158(22.7)  | 3.51(3.45-3.57)    | <0.001 | 2.68(2.60-2.75) | <0.001 |
| N2                          | 180764(8.4)   | 30293(28.4)  | 7.38(7.26-7.49)    | <0.001 | 2.55(2.47-2.64) | <0.001 |
| N3                          | 51325(2.4)    | 15021(14.1)  | 12.88(12.61-13.15) | <0.001 | 3.49(3.34-3.64) | <0.001 |
| <b>Brain metastasis</b>     |               |              |                    |        |                 |        |
| No                          | 2281034(98.7) | 103467(86.4) | 1.00               |        | 1.00            |        |
| Yes                         | 31123(1.3)    | 16244(13.6)  | 11.51(11.28-11.74) | <0.001 | 2.84(2.71-2.97) | <0.001 |
| <b>Liver metastasis</b>     |               |              |                    |        |                 |        |
| No                          | 2204487(95.4) | 88172(73.2)  | 1.00               |        | 1.00            |        |
| Yes                         | 106578(4.6)   | 32352(26.8)  | 7.59(7.48-7.70)    | <0.001 | 4.52(3.47-4.67) | <0.001 |
| <b>Lung metastasis</b>      |               |              |                    |        |                 |        |
| No                          | 2227995(96.5) | 86698(72.8)  | 1.00               |        | 1.00            |        |
| Yes                         | 79732(3.5)    | 32387(27.2)  | 10.44(10.29-10.59) | <0.001 | 4.36(4.22-4.50) | <0.001 |
| <b>Group</b>                |               |              |                    |        |                 |        |
| Category A                  | 271860(11.7)  | 58350(46.9)  | 1.00               |        | 1.00            |        |
| Category B                  | 1100371(47.5) | 54385(43.7)  | 0.23(0.23-0.24)    | <0.001 | 0.68(0.66-0.70) | <0.001 |
| Category C                  | 942133(40.7)  | 11581(9.3)   | 0.06(0.05-0.07)    | <0.001 | 0.14(0.13-0.15) | <0.001 |
