# Supplementary material for: Reclassified the phenotypes of cancer types and construct a nomogram for predicting bone metastasis risk: A pan‐cancer analysis
Source: PubMed Central journal article supplement (PMC10905679; doi:10.1002/cam4.7014), 2024-03-01
Supplement: CAM4-13-e7014-s003.pdf [file CAM4-13-e7014-s003.pdf]

**Appendix file 6: The differences in the distribution of the associated factors  
for bone metastatic patients diagnosed 2010-2016.**

| <b>Factors</b>              | <b>Category A<br/>N (%)</b> | <b>Category B<br/>N (%)</b> | <b>Category C<br/>N (%)</b> | <b>Chi-square/<br/>Z value</b> | <b>P-value</b> |
|-----------------------------|-----------------------------|-----------------------------|-----------------------------|--------------------------------|----------------|
| <b>Age (years)</b>          |                             |                             |                             | 11479.41                       | <0.001         |
| ≤65                         | 188771(44.6)                | 655595(50.8) <sup>a</sup>   | 424872(54.8) <sup>ab</sup>  |                                |                |
| >65                         | 234302(55.4)                | 634455(49.2) <sup>a</sup>   | 349889(45.2) <sup>ab</sup>  |                                |                |
| <b>Gender</b>               |                             |                             |                             | 12267.17                       | <0.001         |
| Male                        | 195259(46.2)                | 681193(52.8) <sup>a</sup>   | 353197(45.6) <sup>ab</sup>  |                                |                |
| Female                      | 227814(53.8)                | 608857(47.2) <sup>a</sup>   | 421564(54.4) <sup>ab</sup>  |                                |                |
| <b>Race</b>                 |                             |                             |                             | 6918.44                        | <0.001         |
| White                       | 344242(81.8)                | 1015801(79.9) <sup>a</sup>  | 642437(84.3) <sup>ab</sup>  |                                |                |
| Black                       | 44302(10.5)                 | 156068(12.3) <sup>a</sup>   | 68779(9.0) <sup>ab</sup>    |                                |                |
| Asian or pacific islander   | 30030(7.1)                  | 92363(7.3) <sup>a</sup>     | 46125(6.1) <sup>ab</sup>    |                                |                |
| American Indian             | 2400(0.6)                   | 7628(0.6) <sup>a</sup>      | 4933(0.6) <sup>ab</sup>     |                                |                |
| <b>Married status</b>       |                             |                             |                             | 11118.15                       | <0.001         |
| None married                | 184728(46.1)                | 453372(38.4) <sup>a</sup>   | 310097(44.7) <sup>ab</sup>  |                                |                |
| Married                     | 216131(53.9)                | 728752(61.6) <sup>a</sup>   | 384274(55.3) <sup>ab</sup>  |                                |                |
| <b>Insurance</b>            |                             |                             |                             | 5339.05                        | <0.001         |
| Uninsured                   | 10530(2.5)                  | 24724(2.0) <sup>a</sup>     | 22887(3.2) <sup>ab</sup>    |                                |                |
| Medical aid                 | 55989(13.5)                 | 134772(11.0) <sup>a</sup>   | 92605(12.8) <sup>ab</sup>   |                                |                |
| Insured                     | 347062(83.9)                | 1067344(87.0) <sup>a</sup>  | 607854(84.0) <sup>ab</sup>  |                                |                |
| <b>Differentiated Grade</b> |                             |                             |                             | 7726.01                        | <0.001         |
| Well differentiated         | 36490(20.0)                 | 179185(17.3) <sup>a</sup>   | 83317(18.6) <sup>ab</sup>   |                                |                |
| Moderate differentiated     | 58434(32.0)                 | 425480(41.1) <sup>a</sup>   | 224164(50.1) <sup>ab</sup>  |                                |                |
| Poor differentiated         | 76864(42.1)                 | 363961(35.2) <sup>a</sup>   | 102229(22.8) <sup>ab</sup>  |                                |                |
| Undifferentiated            | 10676(5.9)                  | 65866(6.4) <sup>a</sup>     | 38043(8.5) <sup>ab</sup>    |                                |                |
| <b>T stage</b>              |                             |                             |                             | 74638.36                       | <0.001         |
| T1                          | 129383(33.8)                | 607537(51.5) <sup>a</sup>   | 304902(46.4) <sup>ab</sup>  |                                |                |
| T2                          | 102109(26.7)                | 358360(30.4) <sup>a</sup>   | 108843(16.6) <sup>ab</sup>  |                                |                |
| T3                          | 79058(20.7)                 | 152922(13.0) <sup>a</sup>   | 173702(26.5) <sup>ab</sup>  |                                |                |
| T4                          | 72066(18.8)                 | 61437(5.2) <sup>a</sup>     | 69157(10.5) <sup>ab</sup>   |                                |                |
| <b>Lymphatic metastasis</b> |                             |                             |                             | 181162.98                      | <0.001         |
| N0                          | 204700(51.2)                | 975989(80.8) <sup>a</sup>   | 503001(73.2) <sup>ab</sup>  |                                |                |
| N1                          | 47633(11.9)                 | 175864(14.6) <sup>a</sup>   | 109209(15.9) <sup>ab</sup>  |                                |                |
| N2                          | 107708(26.9)                | 35895(3.0) <sup>a</sup>     | 68278(9.9) <sup>ab</sup>    |                                |                |
| N3                          | 40048(10.0)                 | 19798(1.6) <sup>a</sup>     | 6577(1.0) <sup>ab</sup>     |                                |                |
| <b>Brain metastasis</b>     |                             |                             |                             | 133620.64                      | <0.001         |
| No                          | 382251(91.0)                | 1280980(99.5) <sup>a</sup>  | 769058(99.4) <sup>ab</sup>  |                                |                |
| Yes                         | 37966(9.0)                  | 5854(0.5) <sup>a</sup>      | 4367(0.6) <sup>ab</sup>     |                                |                |
| <b>Liver metastasis</b>     |                             |                             |                             | 13436.48                       | <0.001         |
| No                          | 381416(90.8)                | 1228960(95.5) <sup>a</sup>  | 723388(93.6) <sup>ab</sup>  |                                |                |
| Yes                         | 38811(9.2)                  | 57775(4.5) <sup>a</sup>     | 49844(6.4) <sup>ab</sup>    |                                |                |
| <b>Lung metastasis</b>      |                             |                             |                             | 50420.14                       | <0.001         |

---

|     |              |                            |                            |
|-----|--------------|----------------------------|----------------------------|
| No  | 370318(88.6) | 1243993(96.8) <sup>a</sup> | 744670(96.4) <sup>ab</sup> |
| Yes | 47578(11.4)  | 41166(3.2) <sup>a</sup>    | 27474(3.6) <sup>ab</sup>   |

---

Note: a: reached significant level compared with Category A; b: reached significant level compared with Category B
