# Supplementary material for: Reclassified the phenotypes of cancer types and construct a nomogram for predicting bone metastasis risk: A pan‐cancer analysis
Source: PubMed Central journal article supplement (PMC10905679; doi:10.1002/cam4.7014), 2024-03-01
Supplement: CAM4-13-e7014-s004.pdf [file CAM4-13-e7014-s004.pdf]

## Regression of Diagnostic year on Logit Bone Prevalence

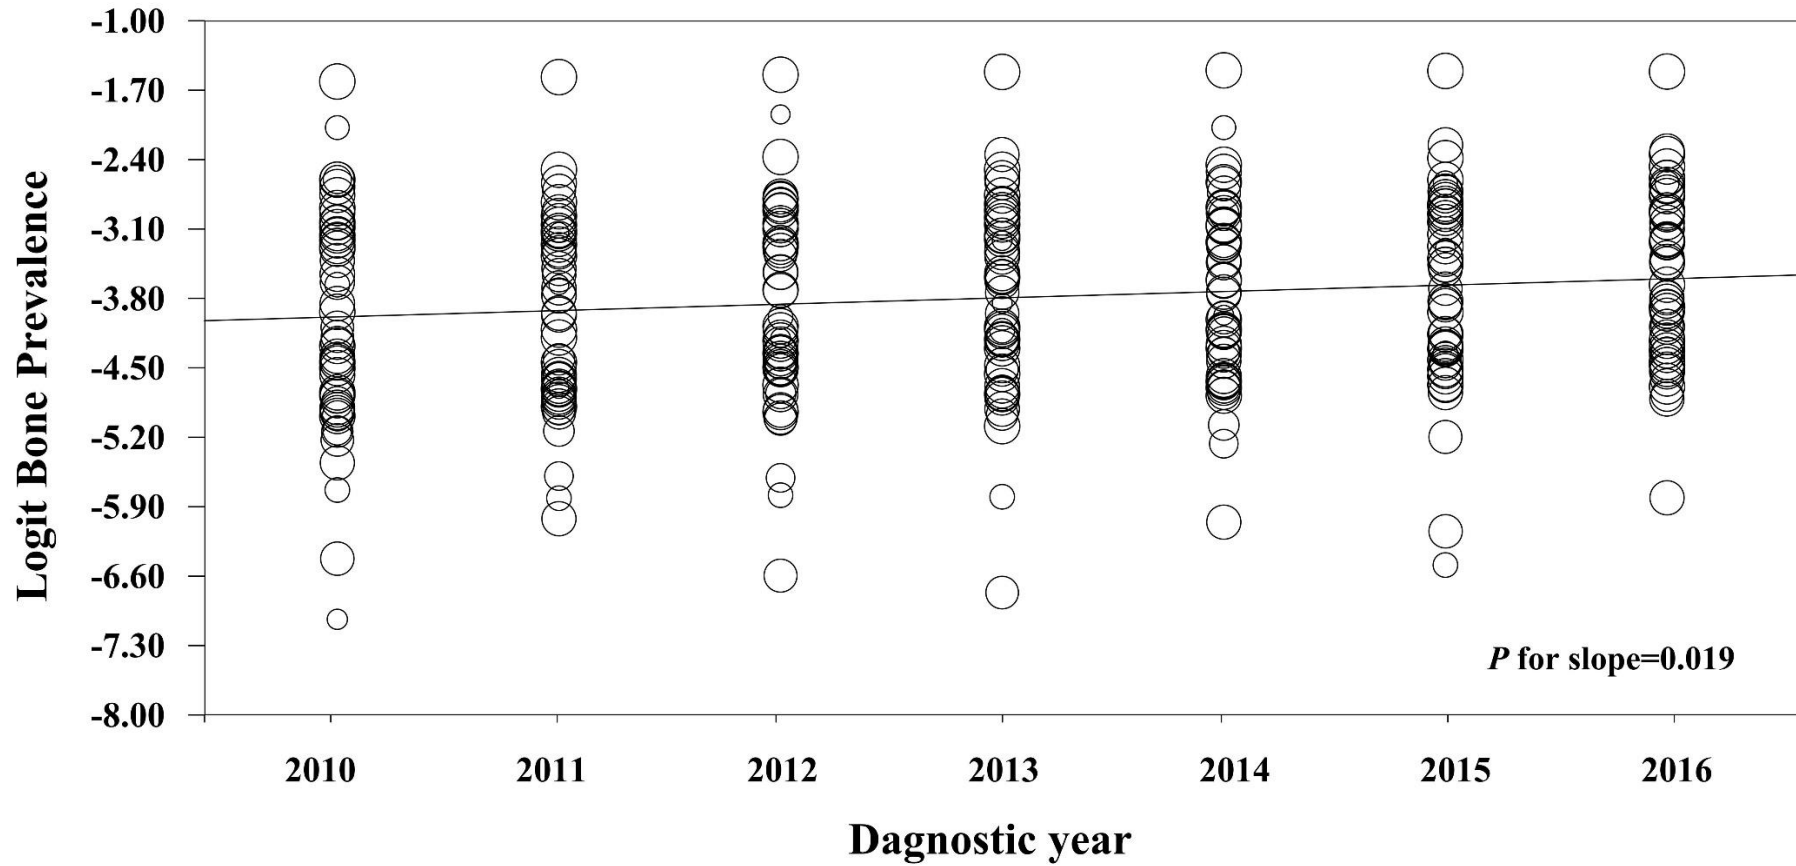

Appendix file 5: Meta-regression plot for the trend of the pooled bone metastasis prevalence changes with the diagnosed year.
