# Supplementary material for: Reclassified the phenotypes of cancer types and construct a nomogram for predicting bone metastasis risk: A pan‐cancer analysis
Source: PubMed Central journal article supplement (PMC10905679; doi:10.1002/cam4.7014), 2024-03-01
Supplement: CAM4-13-e7014-s006.pdf [file CAM4-13-e7014-s006.pdf]

**Appendix file 3: The differences in demographic and clinical characteristics between the construction and validation dataset.**

| <b>Factors</b>              | <b>2010-2016<br/>N (%)</b> | <b>2017-2018<br/>N (%)</b> | <b>Chi-square/<br/>Z value</b> | <b>P-value</b> |
|-----------------------------|----------------------------|----------------------------|--------------------------------|----------------|
| <b>Age (years)</b>          |                            |                            | 731.01                         | <0.001         |
| ≤65                         | 1248635(51.2)              | 136328(48.5)               |                                |                |
| >65                         | 1190045(48.8)              | 144710(51.5)               |                                |                |
| <b>Gender</b>               |                            |                            | 6.89                           | 0.01           |
| Male                        | 1203836(49.4)              | 139467(49.6)               |                                |                |
| Female                      | 1234844(50.6)              | 141571(50.4)               |                                |                |
| <b>Race</b>                 |                            |                            | 1952.10                        | <0.001         |
| White                       | 1962889(81.6)              | 219206(79.3)               |                                |                |
| Black                       | 264289(11.0)               | 30189(10.9)                |                                |                |
| Asian or pacific islander   | 164808(6.8)                | 24899(9.0)                 |                                |                |
| American Indian             | 14611(0.6)                 | 2236(0.8)                  |                                |                |
| <b>Married status</b>       |                            |                            |                                |                |
| None married                | 927767(41.6)               | -                          |                                |                |
| Married                     | 1304841(58.4)              | -                          |                                |                |
| <b>Insurance</b>            |                            |                            |                                |                |
| Uninsured                   | 56887(2.5)                 | -                          |                                |                |
| Medical aid                 | 277236(12.0)               | -                          |                                |                |
| Insured                     | 1983236(85.6)              | -                          |                                |                |
| <b>Differentiated Grade</b> |                            |                            | 52.59                          | <0.001         |
| Well differentiated         | 296610(18.0)               | 37607(22.9)                |                                |                |
| Moderate differentiated     | 702532(42.7)               | 71300(43.5)                |                                |                |
| Poor differentiated         | 536076(32.6)               | 44153(26.9)                |                                |                |
| Undifferentiated            | 111621(6.8)                | 10866(6.6)                 |                                |                |
| <b>T stage</b>              |                            |                            | 10.50                          | <0.001         |
| T1                          | 1033435(47.0)              | 111862(48.2)               |                                |                |
| T2                          | 563781(25.6)               | 58862(25.4)                |                                |                |
| T3                          | 400662(18.2)               | 40066(17.3)                |                                |                |
| T4                          | 200595(9.1)                | 21335(9.2)                 |                                |                |
| <b>Lymphatic metastasis</b> |                            |                            | 14.91                          | <0.001         |
| N0                          | 1665727(73.4)              | 177103(74.6)               |                                |                |
| N1                          | 327328(14.4)               | 34528(14.6)                |                                |                |
| N2                          | 211057(9.3)                | 18633(7.9)                 |                                |                |
| N3                          | 66346(2.9)                 | 7041(3.0)                  |                                |                |
| <b>Bone metastasis</b>      |                            |                            | 114.48                         | <0.001         |

|                         |               |              |       |        |
|-------------------------|---------------|--------------|-------|--------|
| No                      | 2314364(94.9) | 265391(94.4) |       |        |
| Yes                     | 124316(5.1)   | 15650(5.6)   |       |        |
| <b>Brain metastasis</b> |               |              | 1.65  | 0.20   |
| No                      | 2384501(98.1) | 275069(98.1) |       |        |
| Yes                     | 47367(1.9)    | 5363(1.9)    |       |        |
| <b>Liver metastasis</b> |               |              | 6.08  | 0.01   |
| No                      | 2292659(94.3) | 264106(94.2) |       |        |
| Yes                     | 138930(5.7)   | 16344(5.8)   |       |        |
| <b>Lung metastasis</b>  |               |              | 35.33 | <0.001 |
| No                      | 2314693(95.4) | 267832(95.6) |       |        |
| Yes                     | 112119(4.6)   | 12244(4.4)   |       |        |
