# Supplementary material for: Reclassified the phenotypes of cancer types and construct a nomogram for predicting bone metastasis risk: A pan‐cancer analysis
Source: PubMed Central journal article supplement (PMC10905679; doi:10.1002/cam4.7014), 2024-03-01
Supplement: CAM4-13-e7014-s007.pdf [file CAM4-13-e7014-s007.pdf]

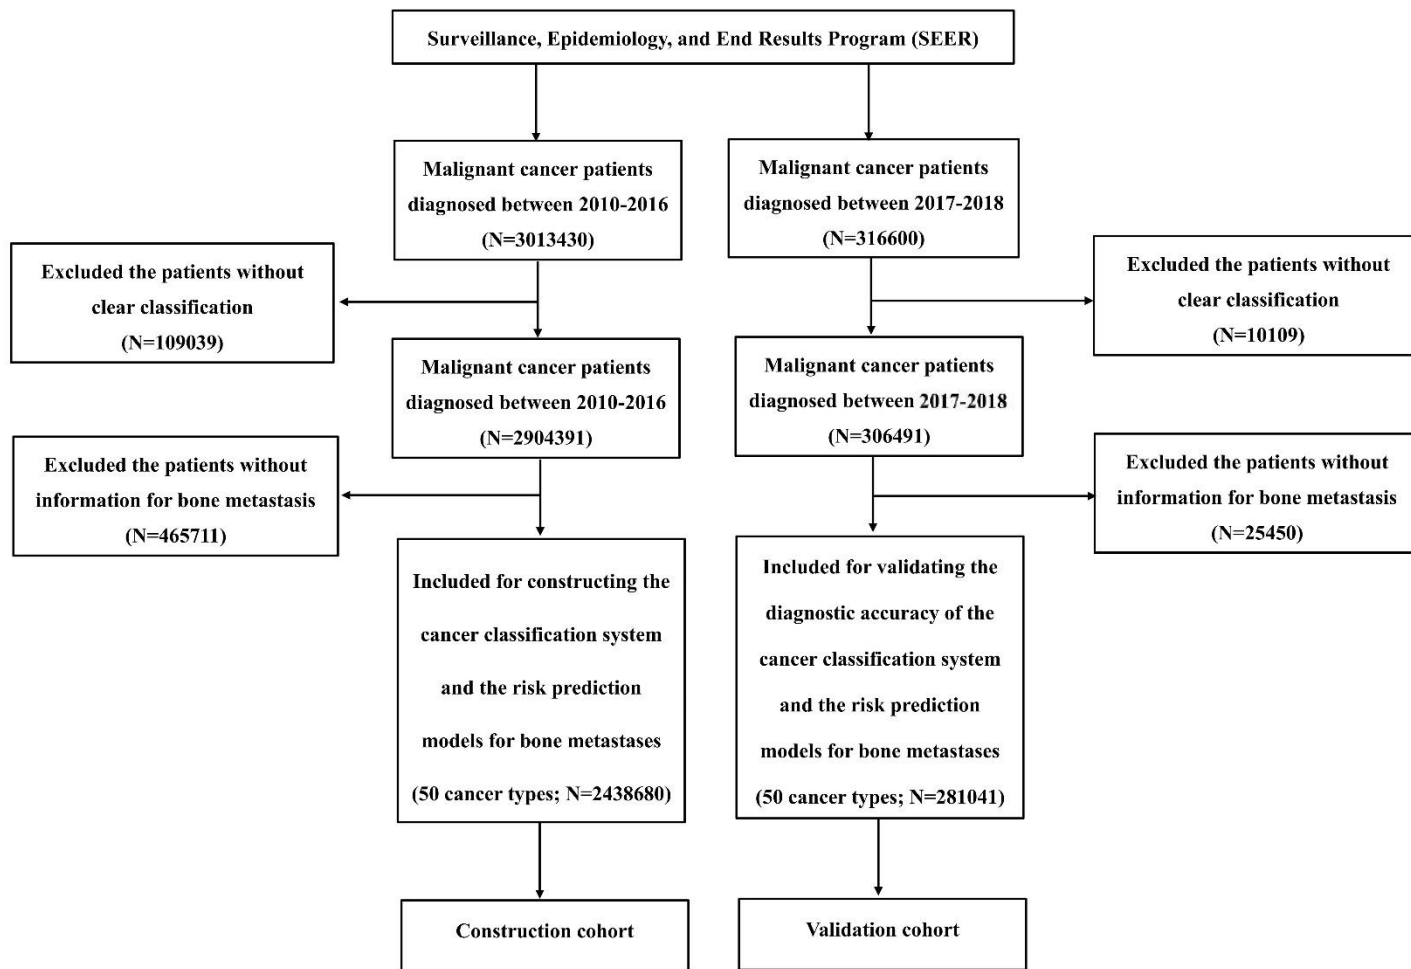

**Appendix file 1: Flow-chart for the patients selection.**
